# Supplementary material
Source: publisher site journal article supplement (https://www.dovepress.com/article/487126)
Supplement: Supplementary file 1 [file get_supplementary_file.php]

**Appendix A. Supplementary data**

**Supplementary Tables:**

**Table S1 Pan-cancer data acquired from TCGA database**

| **Abbreviation** | **Full name** | **Tumor samples** | **Normal samples** |
| --- | --- | --- | --- |
| ACC | Adrenocortical carcinoma | 79 | 0 |
| BLCA | Bladder urothelial carcinoma | 408 | 19 |
| BRCA | Breast invasive carcinoma | 1091 | 113 |
| CESC | Cervical squamous cell carcinoma and endocervical adenocarcinoma | 304 | 3 |
| CHOL | Cholangiocarcinoma | 36 | 9 |
| COAD | Colon adenocarcinoma | 456 | 41 |
| DLBC | Lymphoid neoplasm diffuse large B-cell lymphoma |  |  |
| ESCA | Esophageal carcinoma | 161 | 11 |
| GBM | Glioblastoma multiforme | 161 | 5 |
| HNSC | Head and neck squamous cell carcinoma | 500 | 44 |
| KICH | Kidney chromophobe | 65 | 24 |
| KIRC | Kidney renal clear cell carcinoma | 534 | 72 |
| KIRP | Kidney renal papillary cell carcinoma | 288 | 32 |
| LAML | Acute myeloid leukemia |  |  |
| LGG | Brain lower grade glioma | 511 | 0 |
| LIHC | Liver hepatocellular carcinoma | 371 | 50 |
| LUAD | Lung adenocarcinoma | 513 | 59 |
| LUSC | Lung squamous cell carcinoma | 501 | 49 |
| MESO | Mesothelioma | 86 | 0 |
| OV | Ovarian serous cystadenocarcinoma | 376 | 0 |
| PAAD | Pancreatic adenocarcinoma | 177 | 4 |
| PCPG | Pheochromocytoma and paraganglioma | 179 | 3 |
| PRAD | Prostate adenocarcinoma | 495 | 52 |
| READ | Rectum adenocarcinoma | 166 | 10 |
| SARC | Sarcoma | 259 | 2 |
| SKCM | Skin cutaneous melanoma | 468 | 1 |
| STAD | Stomach adenocarcinoma | 375 | 32 |
| TGCT | Testicular germ cell tumors | 150 | 0 |
| THCA | Thyroid carcinoma | 502 | 58 |
| THYM | Thymoma | 119 | 2 |
| UCEC | Uterine corpus endometrial carcinoma | 543 | 35 |
| UCS | Uterine carcinosarcoma | 56 | 0 |
| UVM | Uveal melanoma | 80 | 0 |

**Table S2 Plasmid information**

| **Information** | **Stem sequence** |
| --- | --- |
| pPLK-GFP-Puro-sh-NC | GTTCTCCGAACGTGTCACGTT |
| pPLK-GFP-Puro-sh-SPINK4 (#1) | GATGGGCTCACATATACGAAT |
| pPLK-GFP-Puro-sh-SPINK4 (#2) | TGGTAGAGTCTCCAACCTGTT |
| pPLK-GFP-Puro-sh-SPINK4 (#3) | TCATGAAAGATGGCAAATGCT |

**Table S3 Primer sequence for RT-PCR**

| **Gene name** | **Sequence (5’-3’)** |
| --- | --- |
| SPINK4 | F: CAGTGGGTAATCGCCCTGG |
|  | R: CACAGATGGGCATTCTTGAGAAA |
| GAPDH | F: CTCTTCCAGCCTTCCTTCCT |
|  | R: CACCTTCACCGTTCCAGTTT |
